# Supplementary material
Source: publisher figshare collection journal article supplement (https://gsajournals.figshare.com/ndownloader/files/21927651)
Supplement: Supplementary file 1 [file 21927651]

**Assembly of mitochondrial complex I requires the low-complexity protein AMC1  
in *Chlamydomonas reinhardtii***

**Nitya Subrahmanian<sup>\*†</sup>, Andrew David Castonguay<sup>\*‡</sup>, Claire Remacle<sup>§</sup>, Patrice Paul Hamel<sup>\*\*</sup>.**

<sup>\*</sup>The Ohio State University, Department of Molecular Genetics, 500D Aronoff Laboratory, 318 W. 12<sup>th</sup> Avenue, Columbus, OH, 43210, USA.

<sup>†</sup> Plant Cellular and Molecular Biology Graduate Program, The Ohio State University, Columbus, Ohio, USA.

<sup>‡</sup> Molecular Genetics Graduate Program, The Ohio State University, Columbus, Ohio, USA.

<sup>§</sup>University of Liège, Genetics and Physiology of Microalgae, UR InBios/Phytosystems, 4000 Liège, Belgium.

<sup>\*\*</sup> The Ohio State University, Department of Molecular Genetics and Department of Biological Chemistry and Pharmacology, 500D Aronoff Laboratory, 318 W. 12<sup>th</sup> Avenue, Columbus, OH, 43210, USA.

## SUPPORTING INFORMATION

### **Supporting Figures**

Figure S1. Sequence of the insertional *amc1-2* mutation in the *Cre16.g688900* gene of the *amc11* strain.

Figure S2. Sequence of the insertional *amc1-1* mutation in the *Cre16.g688900* gene of the *amc1* strain.

Figure S3. Rescue of the SID phenotype with cosmids containing the wild-type *AMC1* genomic DNA.

Figure S4. Transcript levels in the *amc1-2* mutant are restored by *AMC1* genomic DNA.

Figure S5. The *amc1-2* mutant displays traces of a fully-assembled complex.

Figure S6. Mitochondrial transcript levels in a nuclear *amc* mutant characterized by the loss of the complex I subunit NUOB10.

Figure S7. The C-terminus of *AMC1* is similar to that of hypothetical proteins in *Volvox carteri* and *Gonium pectorale*.

### **Supporting Tables**

Table S1. List of reference numbers for key *Chlamydomonas* strains used in this study.

Table S2. Sequence of primers.

Table S3. Primers used for qRT-PCR.

### **Supporting Methods**

Method S1. Genetic analysis

Method S2. Genomic DNA extraction and diagnostic PCR

Method S3. TAIL-PCR

Method S4. PCR-based screening of *Chlamydomonas* genomic library

Method S5. Biolistic transformation

Method S7. Plasmid construction to determine mitochondrial localization

## SUPPORTING FIGURES

### Figure S1. Sequence of the insertional *amc1-2* mutation in the *Cre16.g688900* gene of the *amc11* strain.

Black font depicts the section of exon 2 in the *Cre16.g688900* gene harboring the insertional *amc1-2* mutation in the *amc11* strain. **Orange bold font** indicates the insertional cassette conferring Hygromycin B resistance. The first 123 bp of the cassette, encoding the promoter region, was deleted upon insertion at this site. The **purple bold font** identifies the co-integrated herring sperm DNA sequences at the 5'- and 3'- ends of the cassette. The nucleotides with a black underline indicate the regions sequenced from TAIL-PCR or diagnostic PCR amplicons.

TGCATAGCTCCTGCCTTCTCACACAGTGGCTGGCGCGCAACGGCAGTAGCAACTG  
GGACCTGTACCGGCTGCTACTGCGGCACCAAGGCCGCGGCGGCGGCGGCGGCGGCGG  
CCGCAAGGCCCGATTTGGATACCATTGCAGTCGCGGTGCCGGGAACCGGCGGTC  
AGGCTGGGATAAGTGACAATTTGAGAACATGTGCGGCGACGGCTGTGGCGAAAGC  
GGTCTTGCAGCACAGCCGGAATGCAGCCCTCAAGCGCACCGGGGCCCAACGGAAC  
CGGTAGCGGTGACAGCGGATGGGTGGAGCCGCGGGCTGCGCTGCGACTGACGC  
AGGCGCTGCGAGCGGCTCTGCCTTCCGCTACGGTTTCCCGCGGCAGCGGCGACG  
CTTGACCAGCCGCGGCGACGGCGCTGGTGCGGTGGTGGCGCCGGTGCCACGT  
CAGGTGCGCGAGGCGGTGCGGGAGCTGCTGCTTGCTGCCGCCGCCGCCACCGG  
GGCCCTCGGAGGCGGCAGCAGCGGTGCCGCAGGCGCTGCAGCAGGTGTTGGAG  
CGGCGGGCGACGCAGTGGCGGCGGCCGGCCGGGAGGTGAGCTTCTGGATACGG  
ACGGCGGCGGCCTTCACGTTGCCGCCGCACCCGGTCGGAGCGGCCGAGGCGGA  
GTTGGTGGCGGGGCTGGGACCGGAGGCGGCGTTGGGTGGCGATCTGGCTGCGG  
CCGCGGCGCCGCTGTTCCGCCGCGTCAGCCCGGACGCGCTGTTGGCCGCCGTCA  
CCGACCTGGTACCTGGCGCGCAGCAACAGCAGCAACAGCAGCAACAGCAGCAAC  
AGCAGCAACAGCAGCAACAGCAACAGCAGCAGCAGCAGGGCCCTGGCCT**AACAC**  
**GCACTGTAGCACACAAGTAAACGTTTGGCAAGCTTTTCAGGAATAGCGTGA**  
**GAAAGAAAAGAAGACTGCAAACCAGACGCCGACTCGGCCGTGTTGCTTTTGA**  
**ATTGAAAGTACCCTTGGGTGAACTTTGTCTTCGTGGTATTCTTGATTCTGATAGTC**  
**TTTGTACAAATGTGTTTGCTCAACCATTAGTTGTGAGCCCTGTAAAAAATGTTTT**

CTCGACCGTTTTGTTGTGAGCCCTGTATGTTTCTAGCTTGCTTGCAACCATATAAA  
CACCTTTGTTTCCATGGGTGTTTTGCTGTTCTGTCCCCAGATACAGACTGAA  
TCTCCGAATCCAGGTTCTTGTTTATTTAGATTATTATGTTGGCCAAACCTCTTACA  
CTGATTGTTCTGTTCAACCTAAAATAAAACAATTATAATCTAGGATATAAATTCTC  
CCCGTCAACTATAAAAAAGGATGGATTTATGTTTATTGCAATACAAATACACCCTT  
TTAAAAATGTATAACCTTGCCTACACTTTATGAACAACCCCTGTCTCCGTCCACCT  
GCGACGTTGCATGGGCGCTCCGATGCCGCTCCAGGGCGAGCGCTGTTTAAATAG  
CCAGGCCCCCGATTGCAAAGACATTATAGCGAGCTACCAAAGCCATATTCAAAC  
ACCTAGATCACTACCACTTCTACACAGGCCACTCGAGCTTGTGATCGCACTCCGC  
TAAGGGGGCGCCTCTTCCTCTTCGTTTCAGTCACAACCCGCAAACATGACACAAG  
AATCCCTGTTACTTCTCGACCGTATTGATTGGATGATTCCTACGCGAGCCTGCG  
GAACGACCAGGAATTCTGGGAGGTGAGTCGACGAGCAAGCCCGGCGGATCAGG  
CAGCGTGCTTGCAGATTTGACTTGCAACGCCCGCATTGTGTGACGAAGGCTTTT  
GGCTCCTCTGTCGCTGTCTCAAGCAGCATCTAACCTGCGTCGCCGTTTCCATTT  
GCAGCCGCTGGCCCGCCGAGCCCTGGAGGAGCTCGGGCTGCCGGTGCCGCCGG  
TGCTGCGGGTGCCCGGCGAGAGCACCAACCCCGTACTGGTCGGCGAGCCCGGC  
CCGGTGATCAAGCTGTTCCGGCGAGCACTGGTGCGGTCCGGAGAGCCTCGCGTC  
GGAGTCGGAGGCGTACGCGGTCTGGCGGACGCCCCGGTGCCGGTGCCCCGCC  
TCCTCGGCCGCGGCGAGCTGCGGCCCGGCACCGGAGCCTGGCCGTGGCCCTAC  
CTGGTGATGAGCCGGATGACCGGCACCACTGGCGGTCCGCGATGGACGGCAC  
GACCGACCGGAACGCGCTGCTCGCCCTGGCCCGCGAACTCGGCCGGGTGCTCG  
GCCGGCTGCACAGGGTGCCGCTGACCGGGAACACCGTGCTACCCCCCATTCC  
GAGGTCTTCCCGGAACTGCTGCGGGAACGCCGCGCGGCGACCGTCGAGGACCA  
CCGCGGGTGGGGCTACCTCTCGCCCCGGCTGCTGGACCGCCTGGAGGACTGGC  
TGCCGGACGTGGACACGCTGCTGGCCGGCCGCGAACCCCGGTTCTGCCACGGC  
GACCTGCACGGGACCAACATCTTCGTGGACCTGGCCGCGACCGAGGTCACCGG  
GATCGTCGACTTCACCGACGTCTATGCGGGAGACTCCCGCTACAGCCTGGTGCA  
ACTGCATCTCAACGCCTTCCGGGGCGACCGCGAGATCCTGGCCGCGCTGCTCGA  
CGGGGCGCAGTGGAAGCGGACCGAGGACTTCGCCCGCGAACTGCTCGCCTTCA  
CCTTCCTGCACGACTTCGAGGTGTTTCGAGGAGACCCCGCTGGATCTCTCCGGCTT  
CACCGATCCGGAGGAACTGGCGCAGTTCCTCTGGGGGCCGCGGACACCGCCC

CCGGCGCCTGATAAGGATCCCCGCTCCGTGTAAATGGAGGCGCTCGTTGATCTG  
AGCCTTGCCCCCTGACGAACGGCGGTGGATGGAAGATACTGCTCTCAAGTGCTG  
AAGCGGTAGCTTAGCTCCCCGTTTCGTGCTGATCAGTCTTTTTCAACACGTAAAA  
AGCGGAGGAGTTTTGCAATTTTGTGGTTGTAACGATCCTCCGTTGATTTTGGCCT  
CTTTCTCCATGGGCGGGCTGGGCGTATTTGAAGCGGGTACCGGGCCCGTCATCC  
CATGGAAGCTTCTTGCCGGGTGCACAGGCCTGTCACTTGTCCTGTCTTAGTTGC  
AGCAGTCGCCGGTGGACGGACCCTGGGCCTCGCCGGCCAGCACTGTGGACTGC  
GCCGTGGGCGCCATGGATGCCCTGCTGCTGGACGCCGGCGCTGGCCAGCAACAC  
CACCGGCAACAGCACCAACAGCACCCGCAACAGCACCAACAGCACCAAACTTCAC  
ACCCGCAACAG

**Figure S2. Sequence of the insertional *amc1-1* mutation in the *Cre16.g688900* gene of the *amc1* strain.**

Black font depicts the section of exon 2 in the *Cre16.g688900* gene harboring the insertional *amc1-1* mutation in the *amc1* mutant. **Blue bold font** indicates the 1,536 bp of intergenic region from chromosome 17 inserted in exon 2. The **green bold font** and the **orange bold font** identify the co-integrated sequences at the 5'- and 3'- ends of the insertion site, respectively. The co-integrated sequence at the 5'-end (**green bold font**) has similarity to intron 24 of *Cre16.g695800*. The entire nucleotide sequence presented here was sequenced from TAIL-PCR and diagnostic PCR amplicons.

TGCATAGCTCCTGCCTTCTCACACAGTGGCTGGCGCGCAACGGCAGTAGCAACTG  
GGACCTGTACCGGCTGCTACTGCGGCACCAGGCCGCGGCGGGCGGGCGGGCGGCGG  
CCGCAAGGCCCGATTTGGATACCATTGCAGTCGCGGTGCCGGGAACCGGCGGTC  
AGGCTGGGATAAGTGACAATTTGAGAACATGTGCGGCGACGGCTGTGGCGAAAGC  
GGTCTTGCAGCACAGCCGGAATGCAGCCCTCAAGCGCATAAACTCACTCTGACTC  
TCTCATGGCTGTCATCCGAGCCCCAGACTCTCCCCTCTCCCTATCTCTCCCCTAC  
CCCACACCGCTGTGCCTGTTGCCCCGACCTATCCCGTAAGTCCTGAGCCGTTA  
CCCGCAGCCCGTCAGTGATAGCCAAGGCCCCCTGCCCACACTAGGGTCAAGAGTA  
CCCCAACCCGCATAGCGTACGCCAGCAGAGCCTCTGCGCCAGGTTGCATACGTG  
TAGTGTCTGGCAGCGATTAGGTACAGCAGCTGATAGCAGGGCGAGCTGGGAGC  
GAGCCAGAGCAGGGTCCGGTTCGGTAGTTGGGCCTGAGCCCGTTCCGGTTAGTGG  
CAGTAGCAGGGAGTGAGGGAGACAGAGACGGGCGTAAGATAGCGTGAGATAGT  
ACAGGGCCTGGGCCTAGGCAGTGGGGCGGACGGCATTGGACCGGGCACGCAC  
GCCTTGTCTGCGGGTTGGGTCTGCGGGGGCTCTCCCCCCCCCTTTCCCTTGGGGT  
GTTGCGCTCCCCTGCCCCAGAGTGCAGGTCGACTGCGACACCTCTGGTCTGAAG  
AAGTTTTGCTTATCCCTGCACCTGGTCTACCTGACCTGCGTGTGACCAAGTCCCC  
GACACGCCGTGCCGGCTTGCGGGACCTGCTTGCTTTCCTGTCTCCCCTCTCTTCT  
CCCTTCCCGTCTCTACCACCCGCCGCGTGCCCCGCACGCGAAGGGTAACCCCAG  
CTACCGCCGGCGGGCGGTGACTCTACTTGGGCAACCCGCCCGACCTTATCTCTCT  
AATCTCTGATTACCCTGGGCGGCAAGGTTGAGTGAGACAGCCTTTGCCACGGCT  
GTGCACCTGCACGCACGCCACCCATCCGGCTCTGTACGAGCCCCTGCTCCTGTT  
ATCCAACCCGCCTAGACCAAACAGCGAAGCCCCTCCCGTGAGTAAAACAGCTAC

CGACGTCCCCATACGGCGGCGCTGGGCACTGCTGGGATCGAAGAGCCCCCTCT  
ACGGCACGCGATCTGCCCCGACAGCTGTTGACACGCGGCGATAAAGTTAGGCG  
AAAAAAGTGTCTGTCTCTGGGGGGTTCGGCACGCCTTTGTTGGTTTCGCTAC  
CGGGACTTCTTCCATCCCCCAGTAGCCACTCATGTCAGACGAAGATGGCTTTCCC  
CGCCGAGCGCGGCCTAGCGCTTTCCATACCGATCTGCAAGGACTTGACTATGAA  
CGTATCACCCAACACTGCGAGCGCTTCGACCCGCGAGTGGCATTCTGTGCGTGAT  
TGACTGGAGTCCGTAGATGAGTTGGCAGAGGAATTCGGTTGGACTGAGTCACGA  
AAGCTCCAACCTTGCCTCTAAACGGCTTGCCCCACGGCCAAGGAGTGGTACCGG  
TCATGGAAGCTAGCCAACCCCATGGCATCGTCCACTTGGGAGGGCTTCTGTGAC  
GCCCTGCGCGAGCGCTGGGGTGTGTCAGACCGCGAGCTGCATCTGGCCCTCGC  
CAACTGCACACAAGGCCCAAGGAGACGGTGC GCGAGTACGCCGACCGTTACC  
TGGGCCTCGTGACCCAACCTGCGCCTCGACTATAACC**ATCCGAGT**ACCGGGCCC  
AACGGAACCGGTAGCGGTGACAGCGGATGGGTGGAGCCGCGGGCTGCGCTGCG  
ACTGACGCAGGCGCTGCGAGCGGCTCTGCCTTCCGCTACGGTTTCCCGCGGCAG  
CGGCGACGCTTGACCAGCCGCGGCGACGGCGCTGGTGCGGTGGTGGCGCCGG  
TGCCACGTCAGGTGCGCGAGGCGGTGCGGGAGCTGCTGCTTGCTGCCGCCGCC  
CCACCGGGGCCCTCGGAGGCGGCAGCAGCGGTGCCGCAGGCGCTGCAGCAGGT  
GTTGGAGCGGCGGGCGACGCAGTGGCGGCGGCCGGCCGGGAGGTGAGCTTCTG  
GATACGGACGGCGGGCGGCCTTCACGTTGCCGCCGCACCCGGTCGGAGCGGCCG  
AGGCGGAGTTGGTGGCGGGGCTGGGACCGGAGGCGGCGTTGGGTGGCGATCTG  
GCTGCGGCCGCGGCGCCGCTGTTCCGCCGCGTCAGCCCGGACGCGCTGTTGGC  
CGCCGTCACCGACCTGGTACCTGGCGCGCAGCAACAGCAGCAACAGCAGCAACA  
GCAGCAACAGCAGCAACAGCAGCAACAGCAGCAACAGCAGCAGCAGGGGCCCTGG  
CCTGGGTGAGCAACCGCGTGCCAGGAAGGGACCCTCGCTGTCTAT

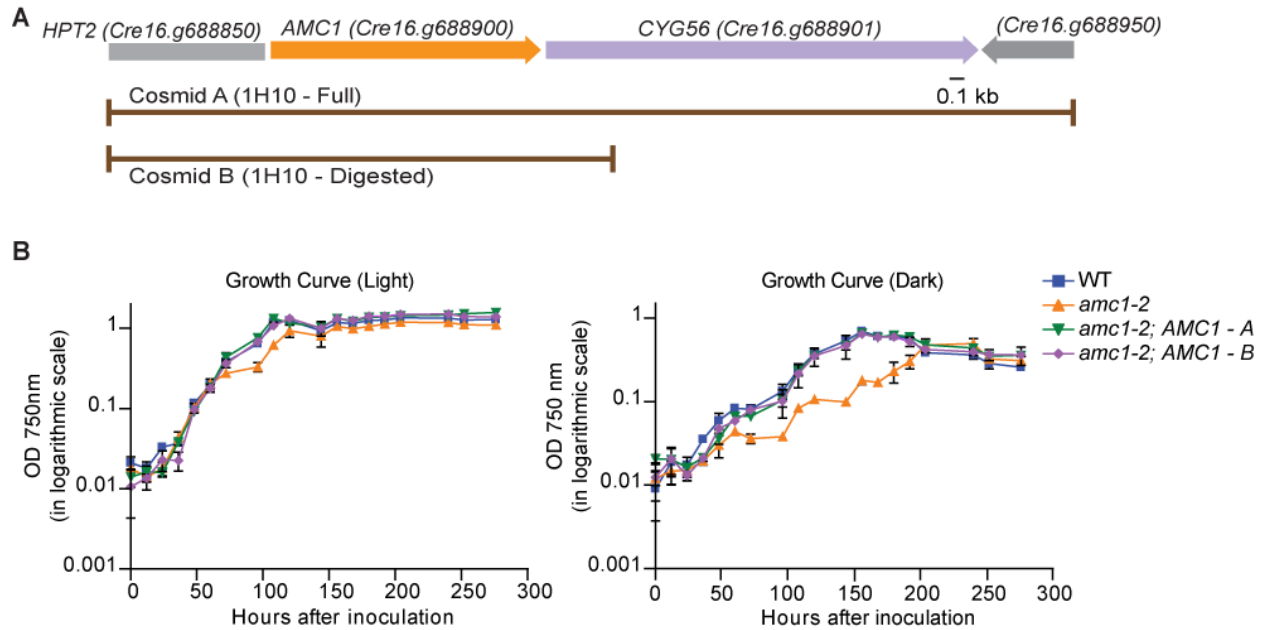

**Figure S3. Rescue of the SID phenotype with cosmids containing the wild-type *AMC1* genomic DNA.**

**(A)** Simplified map of the *Chlamydomonas* genomic DNA contained in the cosmids used for complementation studies. The 1H10 (Cosmid A) carries the truncated *HPT2* gene (*Cre16.g688850*), the *AMC1* gene (*Cre16.g688900*), the *CYG56* gene (*Cre16.g688901*), and *Cre16.g688950*. Cosmid 1H10 was digested by *Bam*HI restriction enzyme to obtain a truncated cosmid (Cosmid B) that only retains one full-length gene, namely *AMC1*. Both cosmids were used to transform the *amc1-2* mutant strain *amc11* (10G11).

**(B)** The growth of WT, *amc1-2* [*amc11* (10G11)], [*amc1-2; AMC1-A*], and [*amc1-2; AMC1-B*] was documented by measuring optical density at A<sub>750</sub>, in the light or in the dark, in the presence of acetate as a carbon source. The average of three biological replicates is reported here, with error bars indicating standard deviation of the mean. The generation time calculated from these growth curves is displayed in Figure 3A.

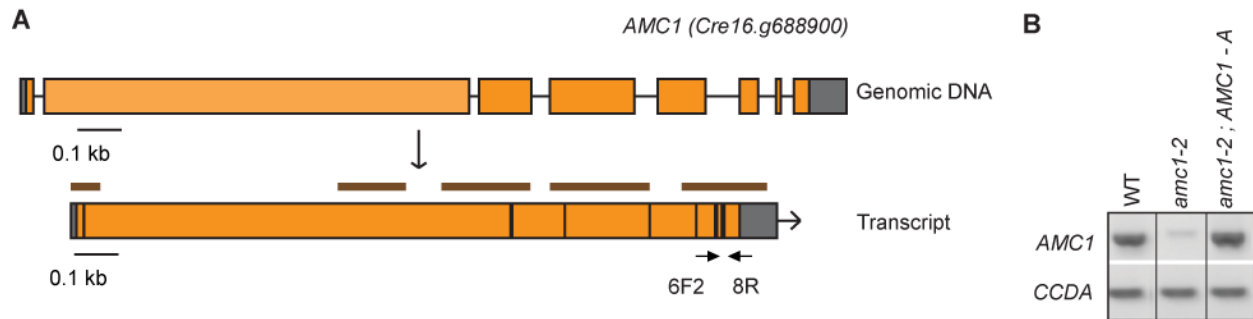

**Figure S4. Transcript levels in the *amc1-2* mutant are restored by *AMC1* genomic DNA.**

**(A)** The current *Chlamydomonas* genome database JGI v5.5 predicts the model for the *AMC1* gene as represented in the top panel. This gene model was experimentally corroborated by PCR amplification using *AMC1*-specific primers with total cellular cDNA prepared from the wild-type (4C<sup>-</sup>). The brown lines, in the bottom panel, identify the sections of the *AMC1* cDNA successfully amplified and confirmed by sequencing. The following primer pairs were successful in amplifying the sequence of the *AMC1* cDNA: Cre16.g688900 5'UTR-F1/E2R10; 10G11 exon2F (1) / *amc11-del1R*; Cre16.g688900 exon2F4/exon3R2; au5.g6830 exon3F / exon4R; Cre16.g688900 exon4F2 / exon4-3R; Cre16.g688900 exon5-F3 / exon-8R; Cre16.g688900 exon8-1F / Cre16.g688900 3'UTR-1R; Cre16.g688900 exon8-1F / 3'UTR-2R (Table S2).

**(B)** Transcript abundance of *AMC1* was analyzed by RT-PCR in the wild-type (4C<sup>-</sup>), *amc1-2* [*amc11* (10G11)] strain, and the complemented strain [*amc1-2*; *AMC1-A*]. The *AMC1*-specific primers (au5.g6830 6F2 / Cre16.g688900 8R), used for amplification, are represented in (Figure S4A) with black arrows. *CCDA*, a gene involved in photosynthesis (GABILLY *et al.* 2011), was used as control for constitutive expression. Three independent biological replicates were performed, and one representative is shown in this figure. The vertical black lines indicate assembly of different lanes from the same gel.

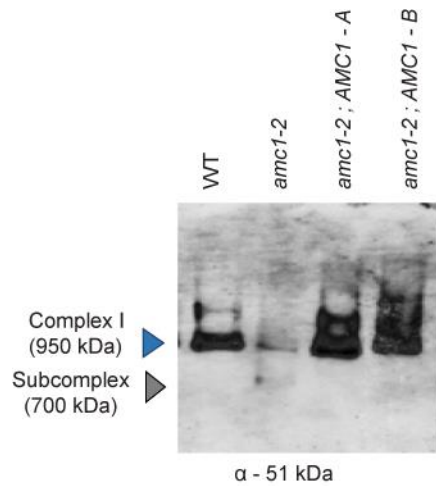

**Figure S5. The *amc1-2* mutant display traces of a fully-assembled complex.**

Immunoblotting using anti-51 kDa antibody of complexes separated by BN-PAGE. Two hundred µg of protein were loaded per lane. While the labile 700 kDa subcomplex can always be detected in the *amc1-2* mutant, in occasional membrane extractions, low levels of a fully-assembled complex I were also detected.

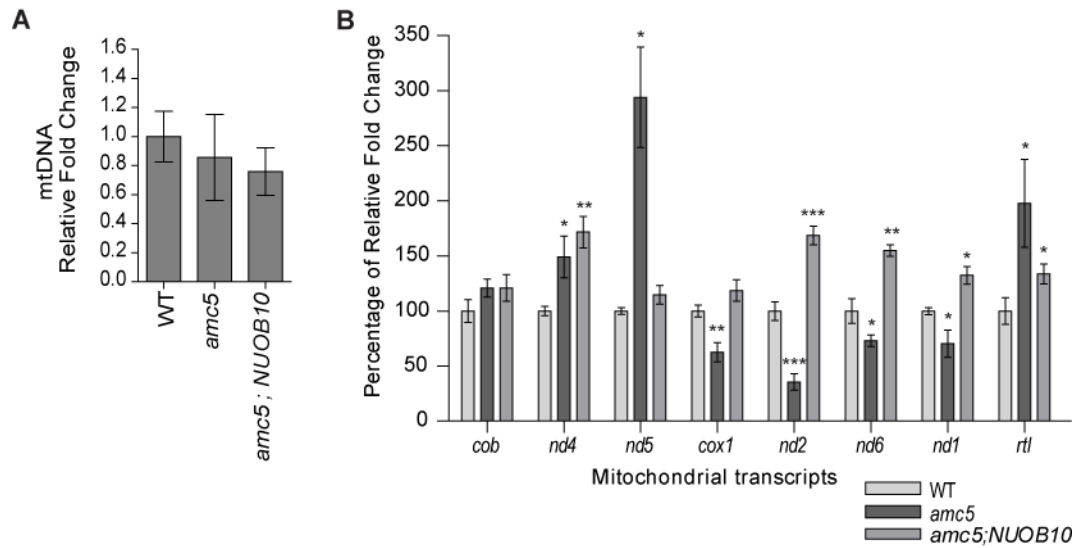

**Figure S6. Mitochondrial transcript levels in a nuclear mutant characterized by the loss of the complex I subunit NUOB10.**

**(A)** Real-time quantitative PCR (qPCR) was used to assess the relative quantity of mtDNA. The mitochondrial *nd4* gene was used as a target gene and the nuclear gene *TUA2*, encoding the alpha tubulin 2 protein, was used as the reference gene. The average was obtained from two biological replicates, each including three technical replicates, and the error bars represent standard deviation of the mean. The results are represented as fold change relative to WT (WT set to 1.0).

**(B)** Real-time quantitative PCR (qPCR) was used to assess the relative abundance of the mitochondrial transcripts, *cob*, *nd4*, *nd5*, *cox1*, *nd2*, *nd6*, *nd1*, and *rtf*. The strains tested were WT (3A<sup>+</sup>), *amc5* (87D3), and [*amc5; NUOB10*]. The relative abundance of the mitochondrial transcripts was determined with respect to the geometric mean of the three reference transcripts *CBLP*, *TUA2*, and *EIFA*. The average is represented from three biological replicates, each analyzed in two technical replicates. The error bars represent standard deviation of the mean. The results are represented as percentage of fold change relative to WT (WT set to 100). The significance of difference in transcript abundance was determined with respect to the corresponding WT by two-tailed unequal variances *t*-test. The symbol \* represents  $p < 0.05$ , \*\* represents  $p < 0.01$ , and \*\*\* represents  $p < 0.001$ .

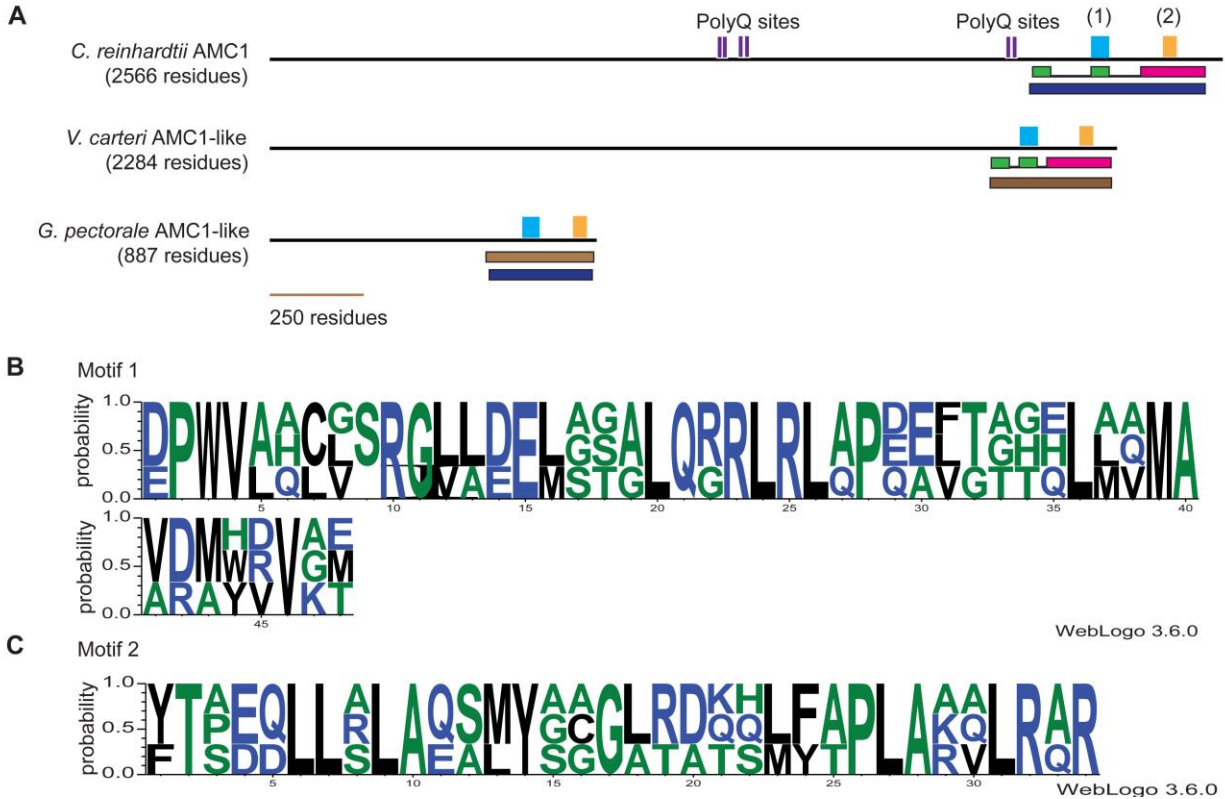

**Figure S7. The C-terminus of AMC1 is similar to that of hypothetical algal proteins in *Volvox carteri* and *Gonium pectorale*.**

Searches for AMC1-like proteins, via BLASTp (ALTSCHUL *et al.* 1990) and DELTA-BLAST (BORATYN *et al.* 2012), revealed that the AMC1 C-terminus (202 residues) has 37% identity with the C-terminus of another large hypothetical protein (2284 aa) from a closely related chlorophycean green alga *Volvox carteri* (Phytozome 12 *Volvox* database v2.1 ID: Vocar.0023s0109.1 / NCBI Accession: XP\_002952084.1). AMC1 and the hypothetical *Volvox* protein show similarity at the C-terminus with another putative protein (887 aa in length) from the green alga *Gonium pectorale* (GPECTOR\_23g121 / NCBI accession KXZ49034). While AMC1 shows only a weak similarity (29% identity amongst 432 residues), the *Volvox* hypothetical protein shows a significant similarity (36% identity amongst 339 residues) with the C-terminal region of the *Gonium* hypothetical protein.

**(A)** Conserved C-terminal motifs and polyQ repeats in the AMC1 protein sequence are shown. The polyQ repeats shown in Figure 7 are represented here as purple bars. Similarity searches with AMC1 identified similarity in the C-terminal end within a *Volvox*

*carteri* hypothetical protein. The pink box depicts 46% similarity in a 202 amino acid region, whereas the green boxes depict 64-68% in a 45 amino acid region. Subsequent similarity searches using the *Volvox* AMC1-like protein yielded a *Gonium pectorale* hypothetical protein. The brown box depicts a 296 amino acid region with 46% similarity to *Gonium* hypothetical protein. The dark blue box depicts the region of low similarity (36%) between the *Chlamydomonas* AMC1 protein and the *Gonium* hypothetical protein. Comparison of these three proteins using the MEME program (BAILEY *et al.* 2009) identified the presence of two different motifs (motif 1 and motif 2, represented by a light blue box and a yellow box, respectively) that is common to the C-terminus of all three proteins. The sequence of these motifs in AMC1 are represented in Figure 7b.

**(B)** and **(C)** are the MEME-generated consensus sequences for motif 1 and motif 2, respectively (BAILEY *et al.* 2009). Motifs 1 and 2 are predicted to be 48 and 34 residues in length, respectively. The height of each letter represents the frequency of occurrence of the corresponding amino acid (y-axis) at a given position in the motif (x-axis). The *E-value* for the occurrence of motif 1 and motif 2 are  $1.3e^{-006}$  and  $1.8e^{-004}$ , respectively.

## SUPPORTING TABLES

**Table S1. List of reference numbers for key *Chlamydomonas* strains used in this study.**

| Strain name           | Genotype                                                     | <i>Chlamydomonas</i> collection center reference number |
|-----------------------|--------------------------------------------------------------|---------------------------------------------------------|
| 3A <sup>+</sup>       | <i>mt<sup>+</sup>; arg7-8</i>                                | CC-5589                                                 |
| 4C <sup>-</sup>       | <i>mt<sup>+</sup>; arg7-8</i>                                | CC-5590                                                 |
| <i>amc5</i> (87D3)    | <i>mt<sup>+</sup>; arg7-8; nuob10::APHVIII</i>               | CC-5591                                                 |
| <i>amc5; NUOB10</i>   | <i>mt<sup>+</sup>; arg7-8; nuob10::APHVIII; NUOB10; ARG7</i> | CC-5592                                                 |
| <i>amc1</i> (4C10)    | <i>mt<sup>+</sup>; arg7-8; amc1-1; APHVII</i>                | CC-5597                                                 |
| <i>amc1</i> (2)       | <i>mt<sup>+</sup>; amc1-1</i>                                | CC-5598                                                 |
| <i>amc1</i> (27)      | <i>mt<sup>+</sup>; arg7-8; amc1-1</i>                        | CC-5599                                                 |
| <i>amc11</i> (10G11)  | <i>mt<sup>+</sup>; arg7-8; amc1-2; APHVII</i>                | CC-5608                                                 |
| <i>amc1-2; AMC1-A</i> | <i>mt<sup>+</sup>; arg7-8; amc1-2; APHVII; AMC1; ARG7</i>    | CC-5609                                                 |
| <i>amc1-2; AMC1-B</i> | <i>mt<sup>+</sup>; arg7-8; amc1-2; APHVII; AMC1; ARG7</i>    | CC-5610                                                 |
| <i>amc11</i> (65)     | <i>mt<sup>+</sup>; amc1-2; APHVII</i>                        | CC-5614                                                 |

**Table S1. List of reference numbers for key *Chlamydomonas* strains used in this study.**

A list of the main strains used in this study is provided here with their genotypes and the reference number for retrieval from the *Chlamydomonas* collection center ([chlamycollection.org](http://chlamycollection.org)).

**Table S2. Sequence of primers.**

| Primer Name            | Sequence (5' to 3')                                      | Target                                        |
|------------------------|----------------------------------------------------------|-----------------------------------------------|
| Cre16.g688900 5'UTR F1 | GCACAGCCACACATGCATAAC                                    | <p><i>AMC1</i><br/>(<i>Cre16.g688900</i>)</p> |
| 10G11 exon2F (1)       | GGTCAGGCTGGGATAAGTG                                      |                                               |
| 10G11 AD1-F (2)        | TACTGTTGCGGGTGCTG                                        |                                               |
| au5.g6830 exon2F2      | TGCATAGCTCCTGCCTTCTC                                     |                                               |
| au5.g6830 exon2F3      | AGGTGAGCTTCTGGATACG                                      |                                               |
| Cre16.g688900 exon2F4  | CTGCGGAAAGGTGGCTTGAC                                     |                                               |
| Cre16.g688900 E2F32    | TGGCGGGTGCCGCGCTGTTC                                     |                                               |
| Cre16.g688900 E2F33    | CGCTGGTGCTGACGATAATG                                     |                                               |
| amc11 del1R            | ATGACAGCGAGGGTCCCTTC                                     |                                               |
| Cre16.g688900 E2R9     | GTGCTGCAAGACCGCTTTC                                      |                                               |
| Cre16.g688900 E2R10    | TGTAGGACCGCCGGAGGCTTG                                    |                                               |
| au5.g6830 exon 3F      | GCTACGGATGGCGAGGTG                                       |                                               |
| Cre16.g688900 exon3R2  | GACGTGGCTTCCAGCTGTTG                                     |                                               |
| Cre16.g688900 exon4 F2 | GGACACGTTGCAGAGGCAACAG                                   |                                               |
| au5.g6830 exon 4R      | GTGCTGCGGAGTGTTATCG                                      |                                               |
| Cre16.g688900 exon4-3R | CAGGCACGCGGCCACCCCACGG                                   |                                               |
| Cre16.g688900 exon5 F3 | CCAGCACCAGCATTCCATAG                                     |                                               |
| au5.g6830 exon6F2      | CTGAGGGACACCAGTCTGTTC                                    |                                               |
| Cre16.g688900 exon8-1F | CTGTGAGCGGGATGAAAGG                                      |                                               |
| Cre16.g688900 exon8 R  | AGGTGACTCGGCACCAAC                                       |                                               |
| Cre16.g688900 3'UTR-1R | AAGAGGTCACTGCCGTTTAC                                     |                                               |
| Cre16.g688900 3'UTR-2R | CCCGCATTGATGAACTTG                                       |                                               |
| PHA-F                  | CACACACGAATTCGATATCAAGCTGGAAGCTTAT<br>GCGCGAGCATGCTGTGC. |                                               |

|                |                                                            |                                                         |
|----------------|------------------------------------------------------------|---------------------------------------------------------|
| PHA-R          | AAATACCGGCGATTTTTCGGCATTTCATAAGCTTA<br>ACCCCCTCGGGTGGCAGC. |                                                         |
| AD1            | NTCASTWTSGWGTT                                             | Partially<br>degenerate<br>primers used for<br>TAIL-PCR |
| AD2            | NGTCGASWGANAAGAA                                           |                                                         |
| RMD228         | WGNTCWGNCANGCG                                             |                                                         |
| APH7R5         | CGGTCGAGAAGTAACAGGG                                        | iHyg3                                                   |
| APH7F3         | CGACGTCTATGCGGGAGACT                                       |                                                         |
| APH7F5         | AACTGCATCTCAACGCCTTCC                                      |                                                         |
| APH7F8         | ACTGCTCGCCTTCACCTTC                                        |                                                         |
| amc1-insert-R2 | GGTACTCTTGACCCTAGTG                                        | <i>amc1</i> insertion                                   |
| amc1 insert F1 | AGATAGCGTGAGATAGTACAG                                      |                                                         |
| ND5-EG-F2      | GATACCCTCCCAACCAACAAGCATAAC                                | <i>nd5</i>                                              |
| cox1-R         | CCGAATAGGGCTGGCATTAC                                       | <i>cox1</i>                                             |
| CCDA.13        | GCCACATTCGCACTGGC                                          | CCDA                                                    |
| CCDA.14        | GGAGTCACCCAGGCCGAGTAC                                      |                                                         |

**Table S2. Sequence of primers.**

List of primers used for TAIL-PCRs, diagnostic PCRs, and RT-PCRs.

**Table S3. Primers used for qRT-PCR.**

| Primer name     | Sequence (5' to 3')   | Target      | Amplicon | Efficiency (%) | $r^2$ value |
|-----------------|-----------------------|-------------|----------|----------------|-------------|
| Chlamy cob fw   | GCCTACCCAACTCCAATGAA  | <i>cob</i>  | 192 bp   | 98.0           | 0.999       |
| Chlamy cob rev  | GTGAGCGTAACGCAAGATCA  |             |          |                |             |
| Chlamy nd4 fw   | ACACTATGGCCGGTTCTTTG  | <i>nd4</i>  | 213 bp   | 98.0           | 0.998       |
| Chlamy nd4 rev  | CACTACCAGCAGTTGGAGCA  |             |          |                |             |
| Chlamy nd5 fw   | CCCCAATTGCTCGTTTTCTA  | <i>nd5</i>  | 226 bp   | 97.0           | 0.997       |
| Chlamy nd5 rev  | CCGGTAACGGTGAATAGCAT  |             |          |                |             |
| Chlamy cox1 fw  | TGGTAATGCCAGCCCTATTC  | <i>cox1</i> | 181 bp   | 98.0           | 0.999       |
| Chlamy cox1 rev | TAAGCGGTCCAACCAGTACC  |             |          |                |             |
| Chlamy nd2 fw   | CCACCATTTGCAGGTTTCTT  | <i>nd2</i>  | 210 bp   | 100.0          | 0.999       |
| Chlamy nd2 rev  | GCAGGCAGAGGTTAGAGTGG  |             |          |                |             |
| Chlamy nd6 fw   | TATTTTGTTGTGCGCTTTGC  | <i>nd6</i>  | 220 bp   | 99.0           | 0.999       |
| Chlamy nd6 rev  | TAGCTCAGTGGCTGGGATCT  |             |          |                |             |
| ND1F2           | GATCTACCAGAGGCTGAGTTG | <i>nd1</i>  | 150 bp   | 102.0          | 0.94        |
| ND1R1           | TTTAAGGGCGCTGAAGCCAC  |             |          |                |             |
| Chlamy rtl fw   | CTGCCCTGCTTCTAATGGAG  | <i>rtl</i>  | 231 bp   | 103.0          | 0.998       |
| Chlamy rtl rev  | TACCAAAACCAGGACGGAAG  |             |          |                |             |

|                           |                           |             |        |       |        |
|---------------------------|---------------------------|-------------|--------|-------|--------|
| Cre16.g688900<br>exon5-1F | GGCCTGGCCGAGGAGATGGG      | <i>AMC1</i> | 82 bp  | 96.8  | 0.974  |
| Cre16.g688900<br>exon5-2R | AGCAACTGGTGGGCTGTGAG      |             |        |       |        |
| EIFA FW                   | CATTGTGGAGCCGCCATTTTC     | <i>EIFA</i> | 122 bp | 99.8  | 0.997  |
| EIFA REV                  | GGCTGCTTGCAATTTGCTTCC     |             |        |       |        |
| CBLP-F                    | GCCACACCGAGTGGGTGTCGTGCG  | <i>CBLP</i> | 201 bp | 108.0 | 0.9961 |
| CBLP-R                    | CCTTGCCGCCCCGAGGCGCACAGCG |             |        |       |        |
| Tub-F                     | GTCCAAGCTGGGCTTCACCGTC    | <i>TUA2</i> | 152 bp | 104.0 | 0.9908 |
| Tub-R                     | GGCGGCAGATGTCGTAGATGGC    |             |        |       |        |

**Table S3. Primers used for qRT-PCR.**

The sequences of primers used for qRT-PCR, with the resultant amplicon size, are shown here. The amplification efficiency for gene-specific primers, for the mitochondrial targets *cox1*, *nd4*, *nd5*, *cox1*, *nd2*, *nd6*, *nd1*, *rtl* (WOBBE AND NIXON 2013), and nuclear targets *CBLP* (ALLEN *et al.* 2007), *TUA2* (VALLEDOR *et al.* 2013), and *EIF1A* (SCHMOLLINGER *et al.* 2014) was identified by generating calibration curves with cDNA dilutions. The  $r^2$  value for PCR efficiency, calculated from each calibration curve, are reported here. These PCR efficiencies were used in calculating the relative expression ratio by the Livak Method (LIVAK AND SCHMITTGEN 2001). The Phytozome IDs of nuclear genes are: *TUA2* - Cre04.g216850, *CBLP* - Cre13.g599400, *EIF1A* - Cre02.g103550.

## SUPPORTING MATERIALS AND METHODS

### Method S1. Genetic analysis

Genetic crosses were conducted according to (HARRIS 1989). Gametogenesis was induced by resuspending vegetative cells in TAP liquid medium lacking nitrogen (TAP-N), at 25° in low light (0.5-1.0  $\mu\text{mol. m}^{-2} \cdot \text{s}^{-1}$ ), with shaking for 5 h. The gametes were mixed in equal proportions and incubated in light (50  $\mu\text{mol. m}^{-2} \cdot \text{s}^{-1}$ ) at 25° overnight. To isolate meiotic zygotes, the mixture was plated on TAP-N solid medium (containing 3% (w/v) select agar) and incubated in light (50  $\mu\text{mol. m}^{-2} \cdot \text{s}^{-1}$ ) at 25° for 5 days. The meiotic progeny was obtained through bulk germination on TARG solid medium, in continuous light at 25°. To isolate vegetative diploids, the mating mixture was directly plated on selective medium mentioned below. Individual diploids and haploid progeny were sub-cloned to a single colony on solid medium and their mating type was determined by diagnostic PCR (WERNER AND MERGENHAGEN 1998).

To determine the segregation of the SID phenotype in the *amc11* mutant, wild-type strain 1' (*mt<sup>+</sup>*) [a 137C derivative, kindly provided by Dr. Claire Remacle, University of Liège, Belgium] was mated with *amc11* (10G11) (*mt<sup>-</sup>*; *amc1-2*; *APHVII*; *arg7-8*). After bulk germination of the meiotic zygotes, haploid progeny were plated on TARG medium and the relevant phenotypes of the progeny were deduced by replica-plating. The haploid progeny derived from these crosses, *amc11* (65) (*mt<sup>-</sup>*; *amc1-2*; *APHVII*), was retained for further analyses.

To test whether the *amc1* and *amc11* mutations are allelic, *amc11* x *amc1* diploids were generated by crossing *amc1*(2) (*mt<sup>+</sup>*; *amc1-1*) with *amc11* (10G11) (*mt<sup>-</sup>*; *amc1-2*; *APHVII*; *arg7-8*) with selection on TAP + HyB solid medium. In addition, haploid progeny from the *amc11* x *amc1* cross were obtained by crossing *amc1*(2) (*mt<sup>+</sup>*; *amc1-1*) with *amc11*(65) (*mt<sup>-</sup>*; *amc1-2*; *APHVII*). The meiotic zygotes were bulk-germinated and the haploid progeny (98 colonies) was tested for the relevant growth phenotypes by replica-plating.

### Method S2. Genomic DNA extraction and diagnostic PCR

Genomic DNA was extracted from *Chlamydomonas* by phenol-chloroform method (SAMBROOK *et al.* 1989). The sequences of primers used in diagnostic PCRs and TAIL-

PCRs are provided in Table S2. For diagnostic PCR analysis, GoTaq Polymerase (Promega, M3008) was used according to manufacturer's protocol, with the addition of 2.5% (v/v) DMSO. Note that a denaturation temperature of 98° was used for *Chlamydomonas* genomic DNA / cDNA templates. The primers used for generating the amplicons in Figure 1D and the corresponding amplicon sizes are as follows: A [Cre16.g688900 E2F33 / E2R9, 400 bp]; B [10G11 exon2F (1) / 10G11 AD1-F (2), 881 bp]; C [au5.g6830 exon2F3 / 10G11 AD1-F (2), 469 bp]; D [10G11 exon2F (1) / amc1-insert-R2, 280 bp]; E [APH7F8 / 10G11 AD1-F (2), 592bp].

### **Method S3. TAIL-PCR (Thermal Asymmetric Interlaced PCR)**

TAIL-PCR was used to identify the sequence flanking the insertional cassette in the *amc11* (10G11) mutant as in (LIU *et al.* 1995). The following partially degenerate primers were used for TAIL-PCR: AD1, AD2, and RMD228 (LIU *et al.* 1995; DENT *et al.* 2005). The iHyg3-specific primers, APH7F3, APH7F5, and APH7F8, were used to amplify the genomic DNA flanking the cassette at its 3'-end. The site of insertion was identified as exon 2 of gene *Cre16.g688900*, as provided by the *Chlamydomonas* genome database version 5.5 in Phytozome version 12 ([https://phytozome.jgi.doe.gov/pz/portal.html#!info?alias=Org\\_Creinhardtii](https://phytozome.jgi.doe.gov/pz/portal.html#!info?alias=Org_Creinhardtii)) (BLABY *et al.* 2014). The sequence flanking the 5'-end of the cassette was obtained by conventional PCR, using the *AMC1*-specific primer au5.g6830 exon2F3 and the iHyg3-specific primer APH7R5 (Figure S1).

To identify the *amc1* mutation, diagnostic PCR was conducted and an insertional mutation was identified in exon 2. TAIL-PCR was used to identify the insertional sequence disrupting the *AMC1* gene in the *amc1-1* mutant by analyzing two independent *amc1-1* strains: *amc1* (4C10) and *amc1* (27). Two sets of TAIL-PCR reactions were successful. In both, the partially degenerate primer RMD228 was used, in combination with the following *AMC1*-specific primers (for primary, secondary, and tertiary reactions, respectively): A) Cre16.g688900 E2F32, Cre16.g688900 E2F33, and au5.g6830 exon2F2, and B) Cre16.g688900 E2F33, au5.g6830 exon2F2, and 10G11 exon2F (1). The complete sequence was retrieved by amplification with the primer pair amc1insertF1/amc11del-R. The inserted DNA, disrupting the *AMC1* gene, was confirmed

by sequencing two independent *amc1-1* strains: the original *amc1* (4C10) and its haploid progeny *amc1*(27) (Figure S2).

#### **Method S4. PCR-based screening of *Chlamydomonas* genomic library**

An *ARG7*-based indexed cosmid library of *Chlamydomonas* genomic DNA, created by Dr. Jean David Rochaix's laboratory (University of Geneva, Switzerland) (PURTON AND ROCHAIX 1994), was screened for the presence of cosmids carrying the *AMC1* gene by diagnostic PCR. The *AMC1*-containing cosmid (referred to as 1H10) was identified using the primer pair au5.g6830 exon2F3/10G11 AD1-F (2). In order to generate a construct containing only the full-length *AMC1* gene, the cosmid 1H10 was digested with *Bam*HI restriction enzyme and recircularized by T4 DNA ligase (Invitrogen, 15224041). The borders of *Chlamydomonas* genomic DNA insert, present in the original cosmid 1H10 (referred to as cosmid A) and the *Bam*HI digested and re-ligated cosmid (referred to as cosmid B) were sequenced to confirm the presence of the region carrying the gene of interest (Figure S3A).

#### **Method S5. Biolistic transformation**

Cosmids A and B were used for transformation by biolistics. The *ARG7* gene in the cosmids was used as a selection marker. The recipient arginine auxotrophic strain *amc11* (10G11) (*mt*; *amc1-2*; *APHVII*; *arg7-8*), also referred to as the *amc1-2* mutant in this manuscript, was subjected to biolistic transformation using a homemade particle delivery device. The strains were grown in liquid TARG medium for 2-3 days until they reached exponential phase ( $3 - 6 \times 10^6$  cells. mL<sup>-1</sup>). The cells were plated on selective TAP medium at  $10^8$  cells/plate. For each bombardment, DNA was coated on sterile 0.6-0.9  $\mu$ m tungsten particles (STREM Chemicals, 93-7437) by using 2  $\mu$ g of cosmid, 16.7 mM Spermidine (Sigma, S2626-5G), and 1 M CaCl<sub>2</sub>. The bombardment was conducted at a helium pressure of 1.725 MPa and vacuum of -92 kPa. The plate was positioned 10.5 cm away from the nozzle containing the coated particles. The bombarded plates were first incubated at low light overnight for recovery and then transferred to continuous light (50  $\mu$ mol. m<sup>2</sup>. s<sup>-1</sup>).

Transformants from cosmid A were screened by replica-plating. Out of 311 transformants tested, 115 transformants displayed rescued growth in the dark. Transformants from

cosmid B were screened by serial dilution. Out of 45 transformants, at least 40 displayed restoration of growth in the dark. Two transformants (two each for cosmids A and B), displaying rescued growth in the dark, were tested for biochemical activity and confirmed for complex I activity restoration. Out of the two, one transformant with cosmid A and one transformant with cosmid B were retained for further analysis.

#### **Method S6. RNA extraction, RT-PCR, and qPCR**

To determine the *AMC1* gene model (Figure S4), RNA was prepared using the Plant RNeasy Kit (Qiagen, 74904) with the following modifications. Cells were grown for 2-3 days on TARG solid medium. Cells (100 mg) were harvested and lysed by vortexing, with 9/10<sup>th</sup> volume of glass beads, for 5 min at 22°. RNA extraction was completed according to manufacturer's protocols. WT (4C-) RNA (2-5 µg) was treated with RQ1 RNase-free DNase I (Promega, M6101). Reverse-transcription was achieved with 400 units of M-MLV reverse transcriptase (Life Technologies, 28025-013). Some regions of the cDNA could be amplified only if the first strand synthesis was conducted with Roche Transcriptor High Fidelity cDNA synthesis kit (05081955001), using OligodT primers or random hexamers as per manufacturer's protocol. Different regions of the *AMC1* cDNA were successfully amplified using either GoTaq Polymerase (Promega, M3008) or Phusion High-Fidelity DNA Polymerase (NEB, B0519S). The primer pairs used for successfully sequenced cDNA amplicons are provided in the legend of Figure S4. The amplicon generated using Cre16.g688900 5'UTR-F1/E2R10 was cloned into Promega pGEM-T easy Vector System. The resulting construct contains the sequence corresponding to the *AMC1* N-terminal that was cloned in-frame to the *ubiG* reporter.

For real-time quantitative PCR (qPCR) of the mitochondrial transcripts, RNA was isolated by phenol-chloroform method modified from (NEWMAN *et al.* 1990). RNA was extracted from 2 x 10<sup>8</sup> cells grown in liquid culture. The cells were first resuspended in TEN buffer (10 mM Tris-HCl pH 8.0, 10 mM EDTA, 150 mM NaCl) and pelleted. The cells were resuspended in 150 µl of water and 300 µl of SDS-EB buffer (2% SDS, 400 mM NaCl, 40 mM EDTA, 100 mM Tris-HCl pH 8.0). Nucleic acids were extracted twice with equal volume of phenol-chloroform (pH 5.0) and RNA was precipitated with 1/3<sup>rd</sup> volume of 8 M LiCl. RNA (8 µg) was treated with RQ1 RNase-free DNase I (Promega, M6101). Reverse

transcription was achieved with 800 units of M-MLV Reverse transcriptase (Life Technologies, 28025-013) using 1 µg of Random Hexamers (Promega, C1181), according to the manufacturer's protocol. The absence of contaminating mtDNA was confirmed by diagnostic PCR of cDNA sample, across the two transcription start sites, with the primer pair ND5-EG-F2 and cox1-R (Table S2). The qPCR was conducted simultaneously on two dilutions of the cDNA and the results were compared for correlation. Amount of cDNA equivalent to 50 ng or 100 ng of total input RNA was used as template for qPCR using SensiMix (Bioline, QT-650-05) on a Mastercycler ep gradientS realplex thermocycler (Eppendorf). The qPCR reactions were denatured at 98° for 15 s, annealed at 60° for 20 s and extended at 72° for 20 s. Relative transcript levels were determined by normalizing the levels of target transcripts to the geometric mean of three reference transcripts, *TUA2*, *CBLP*, and *EIF1A*. For determining the relative mitochondrial DNA (mtDNA) content, 8 ng of total genomic DNA was used as template for qPCR. The mitochondrial *nd4* gene was used as the target gene and the nuclear *TUA2* gene was used as the reference. In all cases, normalization of target transcript or gene levels to the reference was performed by the Livak  $2^{-\Delta\Delta Ct}$  method (LIVAK AND SCHMITTGEN 2001). Relative fold change for mtDNA content was calculated by normalizing to the average of the isogenic wild-type strain (set to 1.0). Relative transcript abundance is represented as percentage of wild-type strain. The amplification efficiency for each primer pair was determined by generating calibration curves for each pair of primers using two-fold dilutions of the template (wild-type cDNA). The efficiency was calculated from the slope of the calibration line as  $[10^{(-1/\text{slope})}-1] \times 100$ . The efficiency and  $r^2$  value from the calibration line are reported in Table S3. In Figure 6C, the *amc1-1* and *amc1-2* mtDNA content were normalized to their respective WT, 3A<sup>+</sup> and 4C<sup>-</sup>, respectively. The strains tested in Figure 6D are WT (4C<sup>-</sup>), *amc1-2* [*amc11* (10G11)], and [*amc1-2*; *AMC1-B*]. The strains tested in Figure 6E are WT (3A<sup>+</sup>) and *amc1-1* [*amc1*(4C10)].

#### **Method S7. Plasmid construction to test for mitochondrial localization**

The AMC1 N-terminal mitochondrial targeting sequence was heterologously expressed as a translational fusion with the bacterial UbiG protein in *S. cerevisiae*. For this purpose, plasmids pAHG (*CYC1* promoter + *ubiG*), pQMG (*CYC1* promoter + *ubiG* with 5'-end sequence encoding the COQ3 N-terminal mitochondrial targeting signal), and pAH3

(*CYC1* promoter + *COQ3*), provided by Dr. Catherine Clarke (University of California, Los Angeles) (Hsu *et al.* 1996), were used. The sequence encoding the AMC1 N-terminus (1-59 amino acids) was amplified, using the primers PHA-F and PHA-R, from a plasmid containing a cloned fragment of the *AMC1* cDNA (see Method S6). The PCR product was cloned into the *HindIII* site of the plasmid pAHG (Hsu *et al.* 1996), carrying the *ubiG* gene under the control of the constitutive *CYC1* promoter, by In-Fusion Cloning (In-Fusion HD cloning kit, Clontech, 639648). The resulting construct, containing the sequence corresponding to 1-59 amino acids of AMC1 at the 5'-end of the *ubiG* gene, is referred to as pAHG59. The pAHG, pQMG, pAH3, and pAHG59 plasmids, each containing the *URA3* selectable marker, were introduced into the  $\Delta coq3$  strain by one-step transformation (CHEN *et al.* 1992).

## SUPPLEMENTAL INFORMATION REFERENCES

- Allen, M. D., J. Kropat, S. Tottey, J. A. Del Campo and S. S. Merchant, 2007 Manganese deficiency in *Chlamydomonas* results in loss of photosystem II and MnSOD function, sensitivity to peroxides, and secondary phosphorus and iron deficiency. *Plant Physiol* 143: 263-277.
- Altschul, S. F., W. Gish, W. Miller, E. W. Myers and D. J. Lipman, 1990 Basic local alignment search tool. *J Mol Biol* 215: 403-410.
- Bailey, T. L., M. Boden, F. A. Buske, M. Frith, C. E. Grant *et al.*, 2009 MEME SUITE: tools for motif discovery and searching. *Nucleic Acids Res* 37: W202-208.
- Blaby, I. K., C. E. Blaby-Haas, N. Tourasse, E. F. Hom, D. Lopez *et al.*, 2014 The *Chlamydomonas* genome project: a decade on. *Trends Plant Sci* 19: 672-680.
- Boratyn, G. M., A. A. Schaffer, R. Agarwala, S. F. Altschul, D. J. Lipman *et al.*, 2012 Domain enhanced lookup time accelerated BLAST. *Biol Direct* 7: 12.
- Chen, D. C., B. C. Yang and T. T. Kuo, 1992 One-step transformation of yeast in stationary phase. *Curr Genet* 21: 83-84.
- Dent, R. M., C. M. Haglund, B. L. Chin, M. C. Kobayashi and K. K. Niyogi, 2005 Functional genomics of eukaryotic photosynthesis using insertional mutagenesis of *Chlamydomonas reinhardtii*. *Plant Physiol* 137: 545-556.
- Gabilly, S. T., J. Kropat, M. Karamoko, M. D. Page, S. S. Nakamoto *et al.*, 2011 A novel component of the disulfide-reducing pathway required for cytochrome c assembly in plastids. *Genetics* 187: 793-802.
- Harris, E. H., 1989 *The Chlamydomonas Sourcebook: A comprehensive guide to biology and laboratory use*. Academic Press, San Diego, CA.
- Hsu, A. Y., W. W. Poon, J. A. Shepherd, D. C. Myles and C. F. Clarke, 1996 Complementation of coq3 mutant yeast by mitochondrial targeting of the *Escherichia coli* UbiG polypeptide: evidence that UbiG catalyzes both O-methylation steps in ubiquinone biosynthesis. *Biochemistry* 35: 9797-9806.
- Liu, Y. G., N. Mitsukawa, T. Oosumi and R. F. Whittier, 1995 Efficient isolation and mapping of *Arabidopsis thaliana* T-DNA insert junctions by thermal asymmetric interlaced PCR. *Plant J* 8: 457-463.
- Livak, K. J., and T. D. Schmittgen, 2001 Analysis of relative gene expression data using real-time quantitative PCR and the 2(-Delta Delta C(T)) Method. *Methods* 25: 402-408.

- Newman, S. M., J. E. Boynton, N. W. Gillham, B. L. Randolph-Anderson, A. M. Johnson *et al.*, 1990 Transformation of chloroplast ribosomal RNA genes in *Chlamydomonas*: molecular and genetic characterization of integration events. *Genetics* 126: 875-888.
- Purton, S., and J. D. Rochaix, 1994 Complementation of a *Chlamydomonas reinhardtii* mutant using a genomic cosmid library. *Plant Mol. Biol.* 24: 533-537.
- Sambrook, J., E. F. Fritsch and T. Maniatis, 1989 *Molecular Cloning A Laboratory Manual*. Cold Spring Harbor Laboratory Press, New York.
- Schmollinger, S., T. Muhlhaus, N. R. Boyle, I. K. Blaby, D. Casero *et al.*, 2014 Nitrogen-Sparing Mechanisms in *Chlamydomonas* Affect the Transcriptome, the Proteome, and Photosynthetic Metabolism. *Plant Cell* 26: 1410-1435.
- Valledor, L., T. Furuhashi, A. M. Hanak and W. Weckwerth, 2013 Systemic cold stress adaptation of *Chlamydomonas reinhardtii*. *Mol Cell Proteomics* 12: 2032-2047.
- Werner, R., and D. Mergenhagen, 1998 Mating Type Determination of *Chlamydomonas reinhardtii* by PCR. *Plant Molecular Biology Reporter* 16: 295-299.
- Wobbe, L., and P. J. Nixon, 2013 The mTERF protein MOC1 terminates mitochondrial DNA transcription in the unicellular green alga *Chlamydomonas reinhardtii*. *Nucleic Acids Res* 41: 6553-6567.
